# Supplementary material for: Regulation of lung endoderm progenitor cell behavior by miR302/367
Source: Oxford University Press journal article supplement (doi:10.1242/dev.061762), 2011-02-25
Supplement: dev061762tables1.pdf [file dev061762tables1.pdf]

**Table S1. Primers****QRT-PCR primers, sites written 5' to 3'**

| Gene          | Forward primer            | Reverse primer               |
|---------------|---------------------------|------------------------------|
| <i>Sox2</i>   | TGCACATGGCCCAGCACTA       | TTCTCCAGITTCGCAGTCCAG        |
| <i>Sox9</i>   | GAGGCCACGGAACAGACTCA      | CAGCGCCTTGAAGATAGCATT        |
| <i>Shh</i>    | GTCCTTGTCTGCGTTTCA        | GTGGCGTTACAAAGCAAAT          |
| <i>Fgf10</i>  | TGATGCAAAGGTTATCTGCACAT   | GAGAGTTGCACITTCATACCAAATTC   |
| <i>Spa</i>    | TGCACCTGGAGAACATGGAGACAA  | ATGGATCCTTGCAGCTGAGGACT      |
| <i>Gapdh</i>  | CCTGCACCACCAACTGCTTA      | TCATGAGCCCTCCACAATG          |
| <i>Fgf9</i>   | TTGATTAGCAGTGCCGTCACCTCA  | AGTGCAGAGCAAATTGGCAAGTCC     |
| <i>Wnt7b</i>  | GGATGCCCGTGAGATCAAAA      | CACACCGTGACACTTACATTCCA      |
| <i>Rbl2</i>   | TACACGCTGGAGGGAAATGACCTT  | ACATAGTTTCCTTCAGCGGTCCGGT    |
| <i>Cdkn1a</i> | TTGTACAAGGAGCCAGGCCAAGAT  | ACTAAGTGCTTTGACACCCACGGT     |
| <i>Tiam1</i>  | TGTACAGCGTGACAGTGTCTGACT  | ACGACCACCTTTCTCACACATT       |
| <i>Lis1</i>   | TGCCTTGCTGGGATAAGGACAAT   | ACAAAGCAGCAGTGAACCGCTAAC     |
| <i>Cc10</i>   | TCCTAAACAAGTCTCTGTGTAAGCA | AGGAGACACAGGGCAGTGACA        |
| <i>Spc</i>    | CCCTCCACACCCACCTCTAA      | CACAGCAAGGCCTAGGAAAGC        |
| <i>Spb</i>    | ACGTCCTTGGAAGCCTTCA       | TGTCTTCTGGAGCCACACAG         |
| <i>Aqp5</i>   | TTCTGTCGGAGGGATCTTCAT     | TTTCAGATGTGTTGGGAGAACA       |
| <i>Id2</i>    | TGACCACCTGAACACGGACAT     | GCTATCATTGCACATAAGCTCAGAAGGG |
| <i>Pten</i>   | CGTGGCACTGCTGTTTCACAAGAT  | TCTTCACCTTTAGCTGGCAGACCA     |
| <i>Mnt</i>    | TGGCCCTGTTTACAGTGAGGACT   | TCCCACACAGCAGATGTACCCAAA     |
| <i>Kat2b</i>  | ATGGCCGTGTCATTGGTGGTATCT  | TGGGTTCCATAGCCCTTGACTTGT     |
| <i>Mecp2</i>  | TCAGCACCCAAGTTAGCTTCACT   | CAGTGTCGCCAGAAACATTGAACCA    |

**CHIP assay primers, sites written 5' to 3'**

|       | Forward primer            | Reverse primer            |
|-------|---------------------------|---------------------------|
| Site1 | GCTCATTGTTACCCTAATCTGTGCC | CCATTACCACAAGATATCCTCCTC  |
| Site2 | AAAATCCAGACCTACCCAGGTCCC  | CCTAACTCCTGAGTTCCTTTGGC   |
| Site3 | TGAGCCATTACAGTGATAAGACGAC | GTCAGAAAGACTTGCAGTTCCTATG |

**Sequences used to generate *miR-302-367* cluster in *hSftpc-miR-302-367* transgenic construct, sites written 5' to 3'**

|            | Forward primer      | Reverse primer       |
|------------|---------------------|----------------------|
| miR302-367 | GCTCTTCTGTTTTAACTAG | AACACAAGGAGAGACATAAG |

**Sequences of sponge/decoy sites written 5' to 3'**

|                              |                       |
|------------------------------|-----------------------|
| miR302-a/b/c/d bulged sponge | TAAAACCGAAAGCACTTCTAC |
| miR367 bulged sponge         | TCACCATTGCGCAGTGCAATT |

**Genotyping primers, sites written 5' to 3'**

|                              | Forward primer           | Reverse primer           |
|------------------------------|--------------------------|--------------------------|
| hSftpc-miR302-367 transgenic |                          |                          |
| Primer set1                  | CCTCTCCCTACGGACACATATAAG | TTGTCCAATTATGTCACACCACAG |
| Primer set2                  | ACATGGAAGCACTTACTTTCTTAG | CATTTTCTCTAAGATGCTGTAGGT |
| hSftpc-miR302-367-decoy      |                          |                          |
| Primer set1                  | CCTCTCCCTACGGACACATATAAG | CGTCCTTGAAGAAGATGGTGCG   |
| Primer set2                  | GGCATGGACGAGCTGTACAAG    | CATTTTCTCTAAGATGCTGTAGGT |
