# Supplementary material for: Regulation of lung endoderm progenitor cell behavior by miR302/367
Source: Oxford University Press journal article supplement (doi:10.1242/dev.061762), 2011-02-25
Supplement: dev061762tables2.pdf [file dev061762tables2.pdf]

**Table S2. miR-302-367 targets involved in cell cycle and cell polarity**

| <b>Name</b>                                                                              | <b>ID</b>                                    | <b>Function and process</b>                                                              |
|------------------------------------------------------------------------------------------|----------------------------------------------|------------------------------------------------------------------------------------------|
| <b>Cdkn1a cyclin-dependent kinase inhibitor 1A (P21)</b>                                 | <b>NM_007669, NM_001111099</b>               | <b>cyclin-dependent protein kinase inhibitor activity; cell cycle arrest</b>             |
| <b>Rbl2 (retinoblastoma-like 2)</b>                                                      | <b>NM_011250</b>                             | <b>cell cycle</b>                                                                        |
| <b>Kat2b (lysine acetyltransferase 2B)</b>                                               | <b>NM_020005, XM_906137, XM_284106</b>       | <b>cell cycle</b>                                                                        |
| <b>Mnt (max binding protein)</b>                                                         | <b>NM_010813</b>                             | <b>cell cycle</b>                                                                        |
| <b>Lats2 (large tumor suppressor 2)</b>                                                  | <b>NM_153382, NM_015771</b>                  | <b>G1/S transition of mitotic cell cycle</b>                                             |
| <b>Pten (Phosphatase and tensin homolog )</b>                                            | <b>NM_177096, NM_008960</b>                  | <b>negative regulation of cell proliferation</b>                                         |
| <b>E2f2 (E2F transcription factor 2)</b>                                                 | <b>NM_177733</b>                             | <b>cell cycle</b>                                                                        |
| <b>E2f7 (E2F transcription factor 7)</b>                                                 | <b>NM_178609</b>                             | <b>negative regulation of transcription</b>                                              |
| <b>Suv39h1 (suppressor of variegation 3-9 homolog 1)</b>                                 | <b>NM_011514</b>                             | <b>cell cycle</b>                                                                        |
| <b>Chaf1a (chromatin assembly factor 1, subunit A (p150))</b>                            | <b>NM_013733</b>                             | <b>cell cycle</b>                                                                        |
| <b>Txnip (thioredoxin interacting protein)</b>                                           | <b>NM_023719, NM_001009935</b>               | <b>cell cycle</b>                                                                        |
| <b>Smc2 (structural maintenance of chromosomes 2)</b>                                    | <b>NM_008017</b>                             | <b>cell cycle</b>                                                                        |
| <b>Ppp6c (protein phosphatase 6, catalytic subunit)</b>                                  | <b>NM_024209</b>                             | <b>cell cycle</b>                                                                        |
| <b>Tiam1 (T-lymphoma invasion and metastasis-inducing protein 1)</b>                     | <b>NM_001145887, NM_009384, NM_001145886</b> | <b>Rho guanyl-nucleotide exchange factor activity</b>                                    |
| <b>Pafah1b1 platelet-activating factor acetylhydrolase, isoform 1b, subunit 1 (Lis1)</b> | <b>NM_013625, XM_001476465</b>               | <b>dynein intermediate chain binding; microtubule cytoskeleton organization; mitosis</b> |
| <b>Arhgef18 rho/rac guanine nucleotide exchange factor (GEF) 18</b>                      | <b>NM_133962</b>                             | <b>actin cytoskeleton organization</b>                                                   |
| <b>Tiam2 (T-cell lymphoma invasion and metastasis 2)</b>                                 | <b>NM_011878, NM_001122998</b>               | <b>GTPase activator activity</b>                                                         |
| <b>Rhoq (ras homolog gene family, member Q)</b>                                          | <b>NM_145491</b>                             | <b>actin cytoskeleton organization</b>                                                   |
